# Supplementary material for: Illegitimate Recombination between Duplicated Genes Generated from Recursive Polyploidizations Accelerated the Divergence of the Genus Arachis
Source: MDPI journal article supplement (doi:10.3390/genes12121944), 2021-12-01
Supplement: s1 [file s1]

## Supplemental information:

### **Illegitimate recombination between duplicated genes generated from recursive polyploidizations accelerated the divergence of genus *Arachis***

Shaoqi Shen<sup>1, †</sup>, Yuxian Li<sup>1, †</sup>, Jianyu Wang<sup>1</sup>, Chendan Wei<sup>1</sup>, Zhenyi Wang<sup>1</sup>, Weina Ge<sup>1</sup>, Min Yuan<sup>1</sup>, Lan Zhang<sup>1</sup>, Li Wang<sup>1</sup>, Sangrong Sun<sup>1</sup>, Jia Teng<sup>1</sup>, Qimeng Xiao<sup>1</sup>, Shoutong Bao<sup>1</sup>, Yishan Feng<sup>1</sup>, Yan Zhang<sup>1</sup>, Jiaqi Wang<sup>1</sup>, Yanan Hao<sup>1</sup>, Tianyu Lei<sup>1, \*</sup>, Jinpeng Wang<sup>1,2,3, \*</sup>

<sup>1</sup>School of Life Sciences, and Center for Genomics and Computational Biology, North China University of Science and Technology, Tangshan, Hebei 063000, China

<sup>2</sup>University of Chinese Academy of Sciences, Beijing 100049, China

<sup>3</sup>State Key Laboratory of Systematic and Evolutionary Botany, Institute of Botany, Chinese Academy of Science, Beijing 100093, China

<sup>†</sup>These authors contributed equally to this work.

\* Address correspondence to Jinpeng Wang (Email: [wangjinpeng@ibcas.ac.cn](mailto:wangjinpeng@ibcas.ac.cn)) and Tianyu Lei (Email: [leitianyu@ncst.edu.cn](mailto:leitianyu@ncst.edu.cn)).

## Supplemental figures:

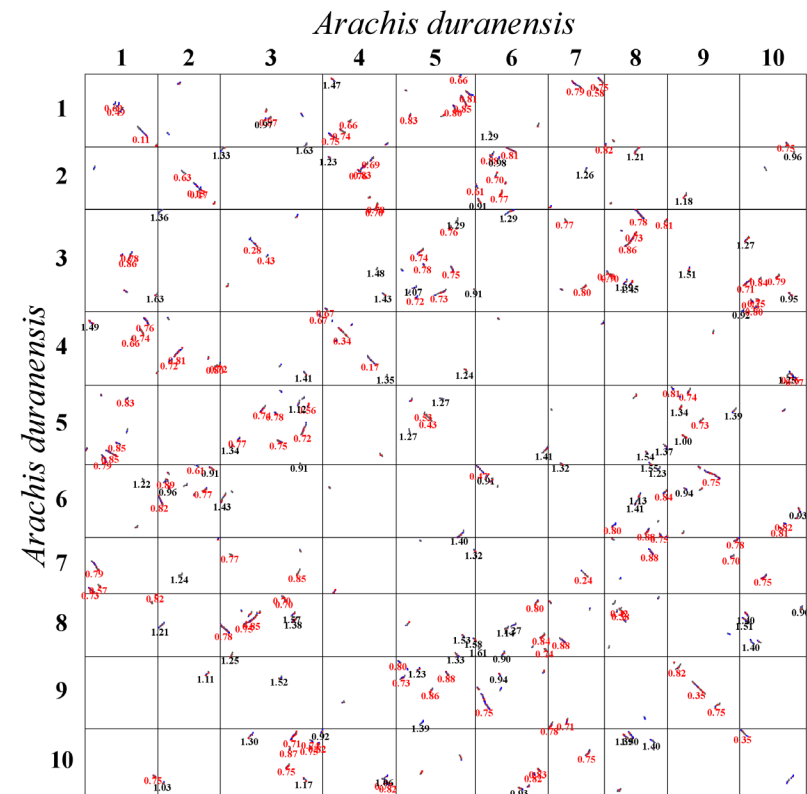

**Supplemental Figure S1.** The homologous colinearity  $K_s$  dotplot within *A. duranensis* genomes. The best, secondary, and other matched homologous gene pairs were shown by red, blue and gray dots, respectively. Mean  $K_s$  of each inferred colinear blocks are shown besides. The  $K_s$  value  $\leq 0.90$  are in red, and others in black, often showing paralogous blocks in duplication events.

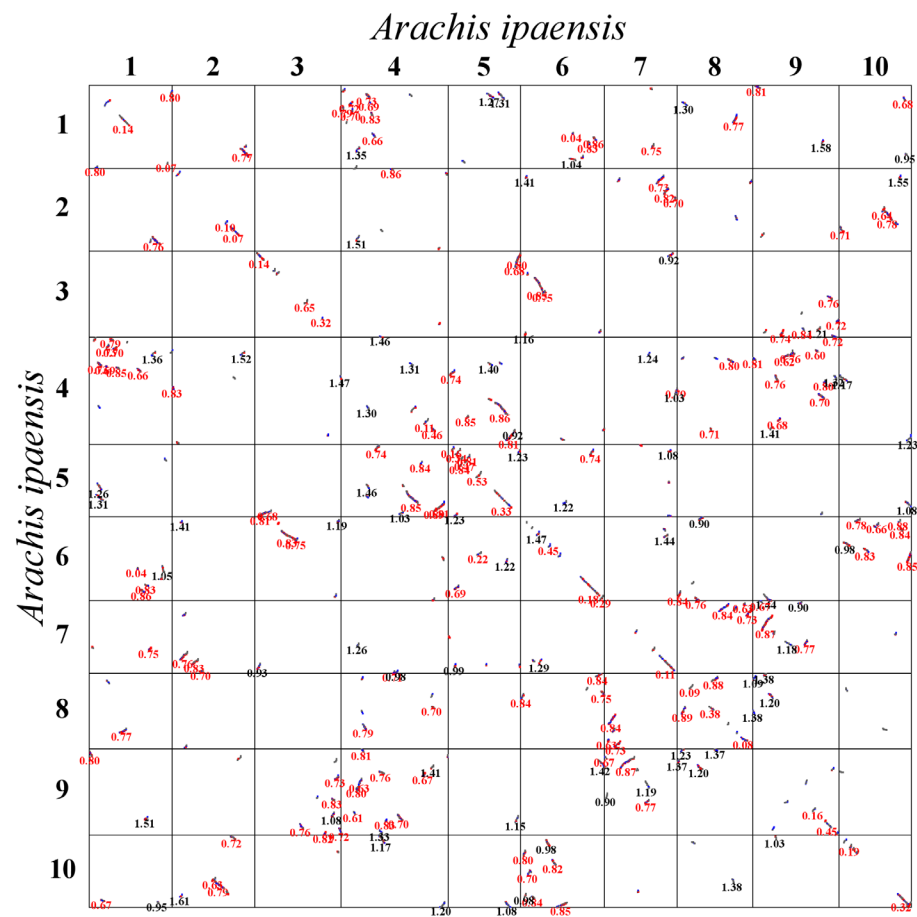

**Supplemental Figure S2.** The homologous colinearity *Ks* dotplot within *A. ipaensis* genomes. The best, secondarily, and other matched homologous gene pairs were shown by red, blue and gray dots, respectively. Mean *Ks* of each inferred colinear blocks are shown besides. The *Ks* value  $\leq 0.90$  are in red, and others in black, often showing paralogous blocks in duplication events.

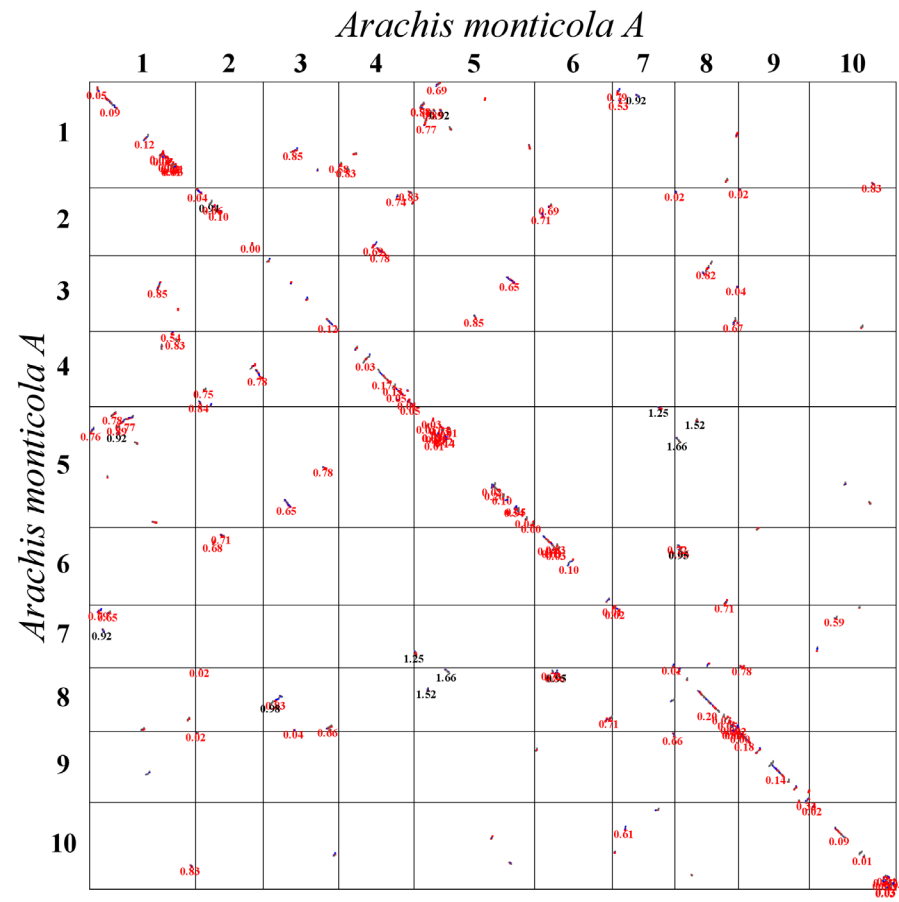

**Supplemental Figure S3.** The homologous colinearity  $K_s$  dotplot within *A. monticola* A genomes. The best, secondarily, and other matched homologous gene pairs were shown by red, blue and gray dots, respectively. Mean  $K_s$  of each inferred colinear blocks are shown besides. The  $K_s$  value  $\leq 0.90$  are in red, and others in black, often showing paralogous blocks in duplication events.

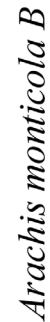

**Supplemental Figure S4.** The homologous colinearity *Ks* dotplot within *A. monticola* B genomes. The best, secondarily, and other matched homologous gene pairs were shown by red, blue and gray dots, respectively. Mean *Ks* of each inferred colinear blocks are shown besides. The *Ks* value  $\leq 0.90$  are in red, and others in black, often showing paralogous blocks in duplication events.

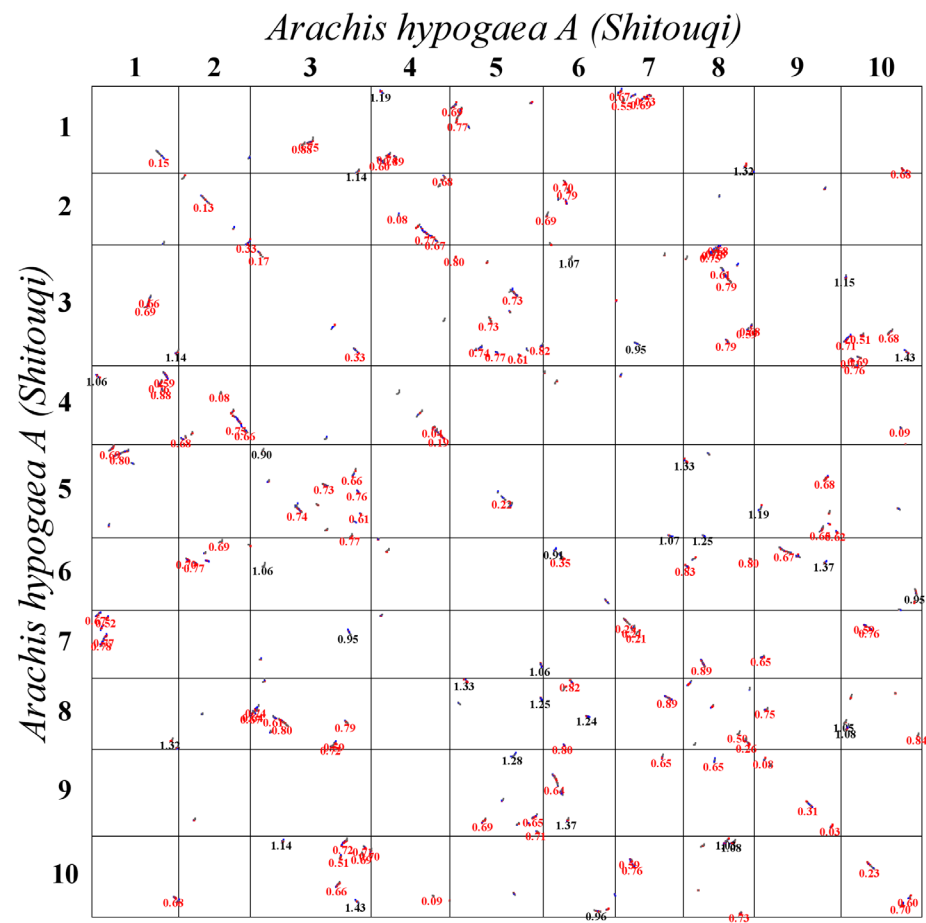

**Supplemental Figure S5.** The homologous colinearity Ks dotplot within *A. hypogaea* A (Shitouqi) genomes. The best, secondarily, and other matched homologous gene pairs were shown by red, blue and gray dots, respectively. Mean Ks of each inferred colinear blocks are shown besides. The Ks value  $\leq 0.90$  are in red, and others in black, often showing paralogous blocks in duplication events.

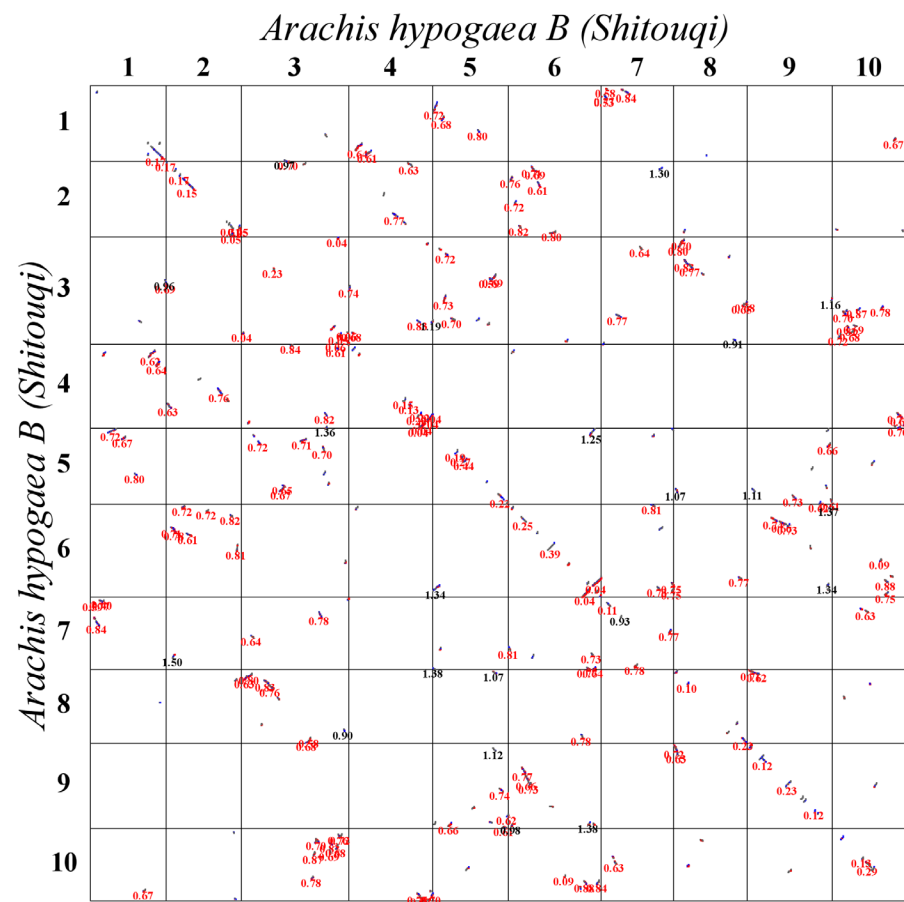

**Supplemental Figure S6.** The homologous colinearity  $K_s$  dotplot within *A. hypogaea* B (Shitouqi) genomes. The best, secondarily, and other matched homologous gene pairs were shown by red, blue and gray dots, respectively. Mean  $K_s$  of each inferred colinear blocks are shown besides. The  $K_s$  value  $\leq 0.90$  are in red, and others in black, often showing paralogous blocks in duplication events.

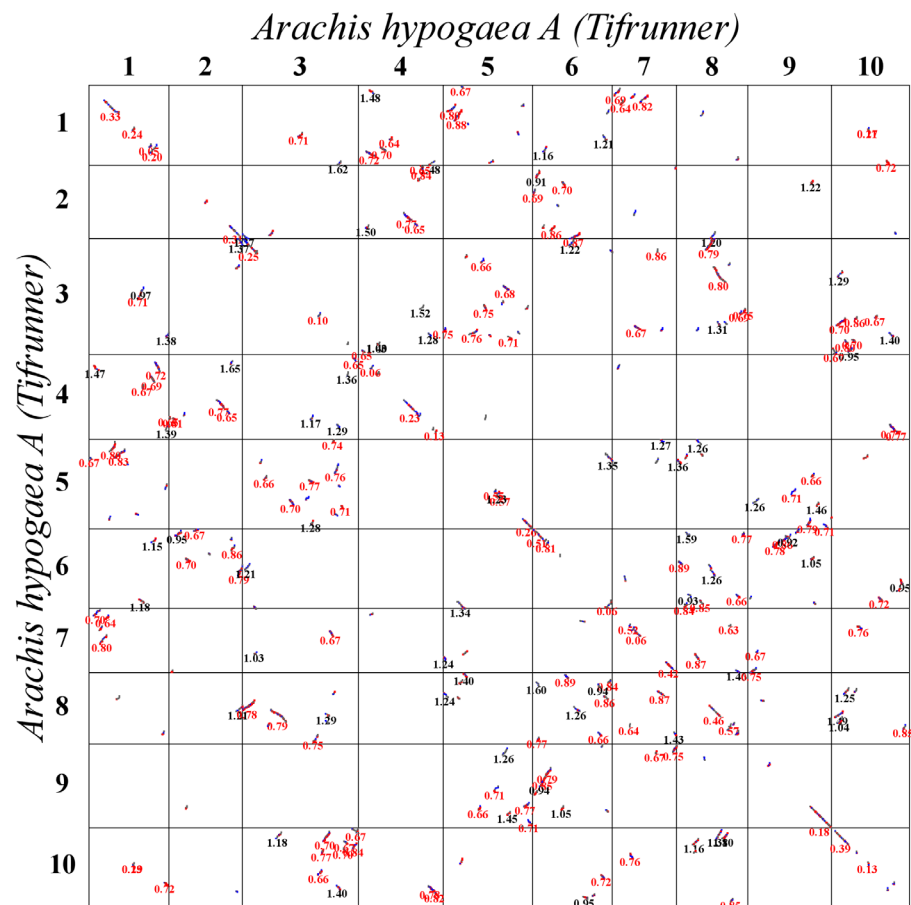

**Supplemental Figure S7.** The homologous colinearity *Ks* dotplot within *A. hypogaea* A (Tifrunner) genomes. The best, secondarily, and other matched homologous gene pairs were shown by red, blue and gray dots, respectively. Mean *Ks* of each inferred colinear blocks are shown besides. The *Ks* value  $\leq 0.90$  are in red, and others in black, often showing paralogous blocks in duplication events.

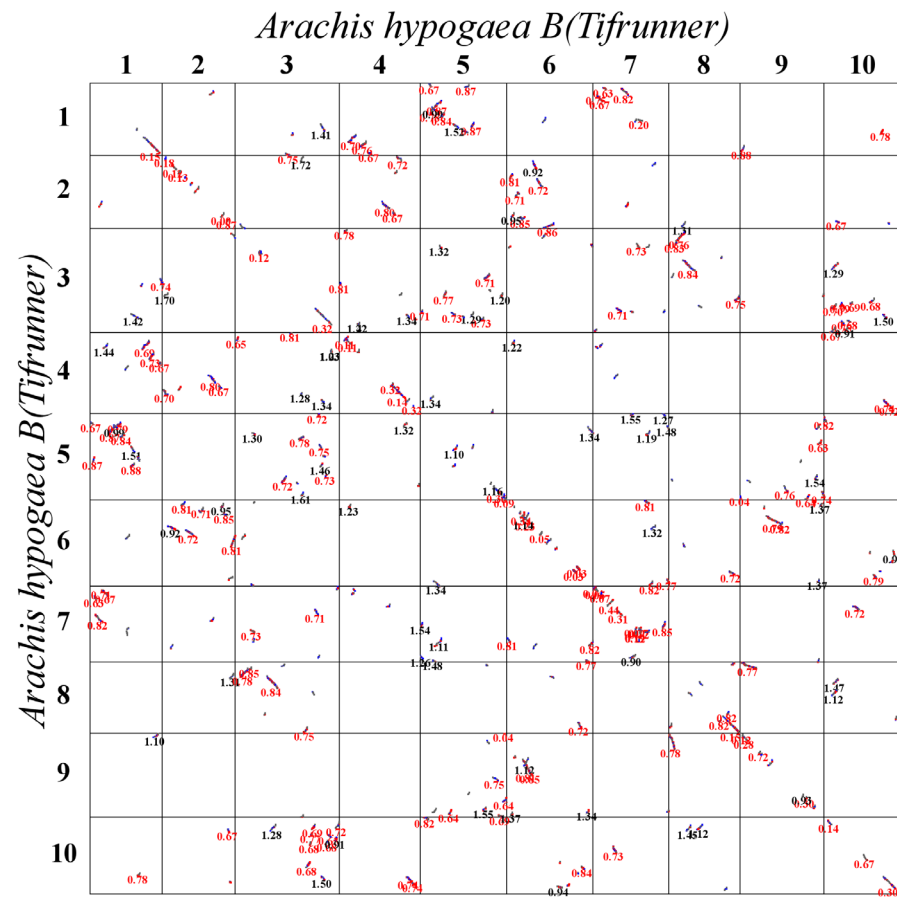

**Supplemental Figure S8.** The homologous colinearity  $K_s$  dotplot within *A. hypogaea* B (Tifrunner) genomes. The best, secondarily, and other matched homologous gene pairs were shown by red, blue and gray dots, respectively. Mean  $K_s$  of each inferred colinear blocks are shown besides. The  $K_s$  value  $\leq 0.90$  are in red, and others in black, often showing paralogous blocks in duplication events.

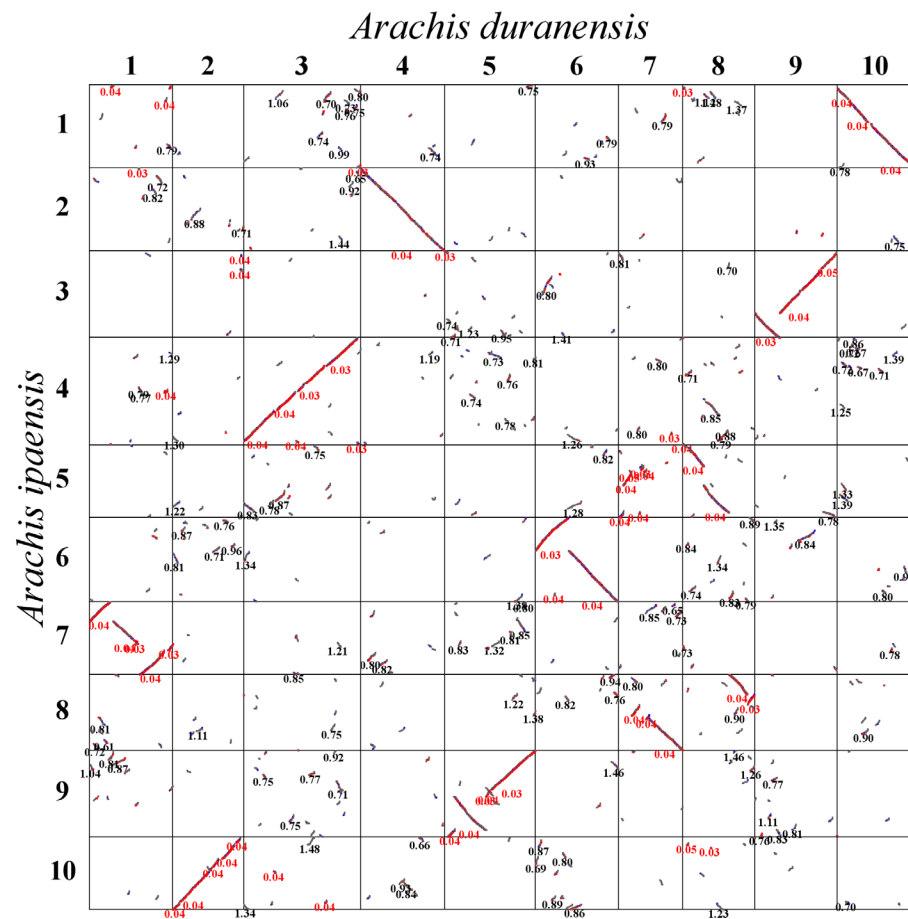

**Supplemental Figure S9.** The homologous colinearity *Ks* dotplot between *A. ipaensis* and *A. duranensis* genomes. The best, secondarily, and other matched homologous gene pairs were shown by red, blue and gray dots, respectively. Mean *Ks* of each inferred colinear blocks are shown besides. The *Ks* value  $\leq 0.10$  are in red, and others in black, often showing paralogous blocks in duplication events.

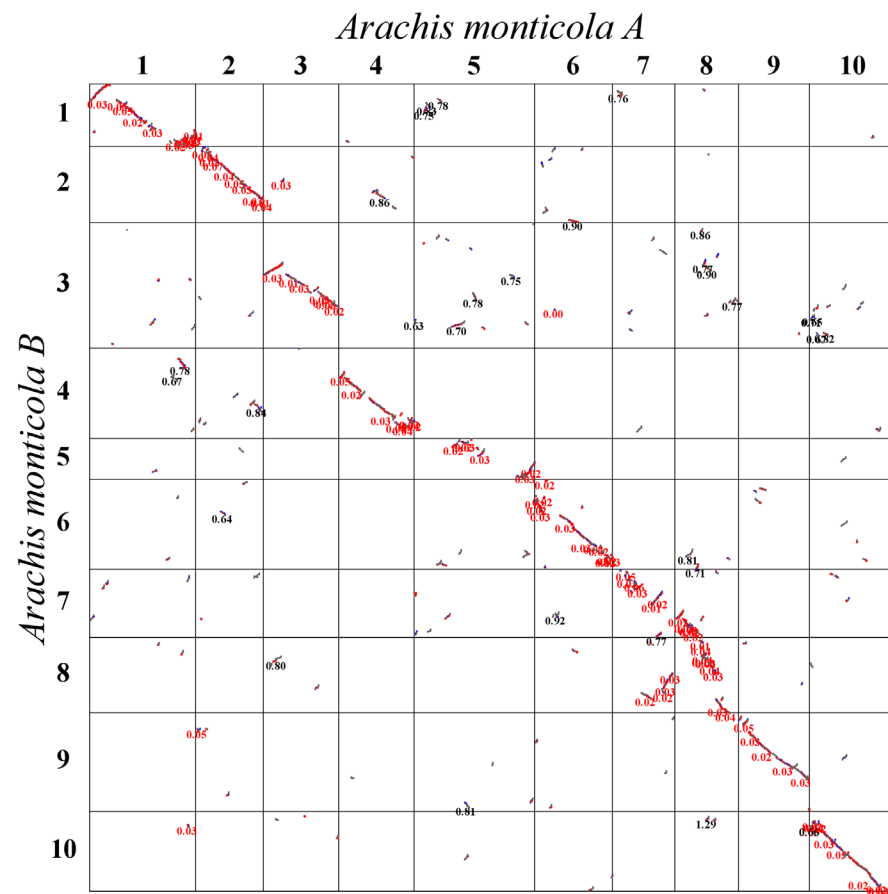

**Supplemental Figure S10.** The homologous colinearity *Ks* dotplot between *A monticola* A and *A monticola* B genomes. The best, secondarily, and other matched homologous gene pairs were shown by red, blue and gray dots, respectively. Mean *Ks* of each inferred colinear blocks are shown besides. The *Ks* value  $\leq 0.10$  are in red, and others in black, often showing paralogous blocks in duplication events.

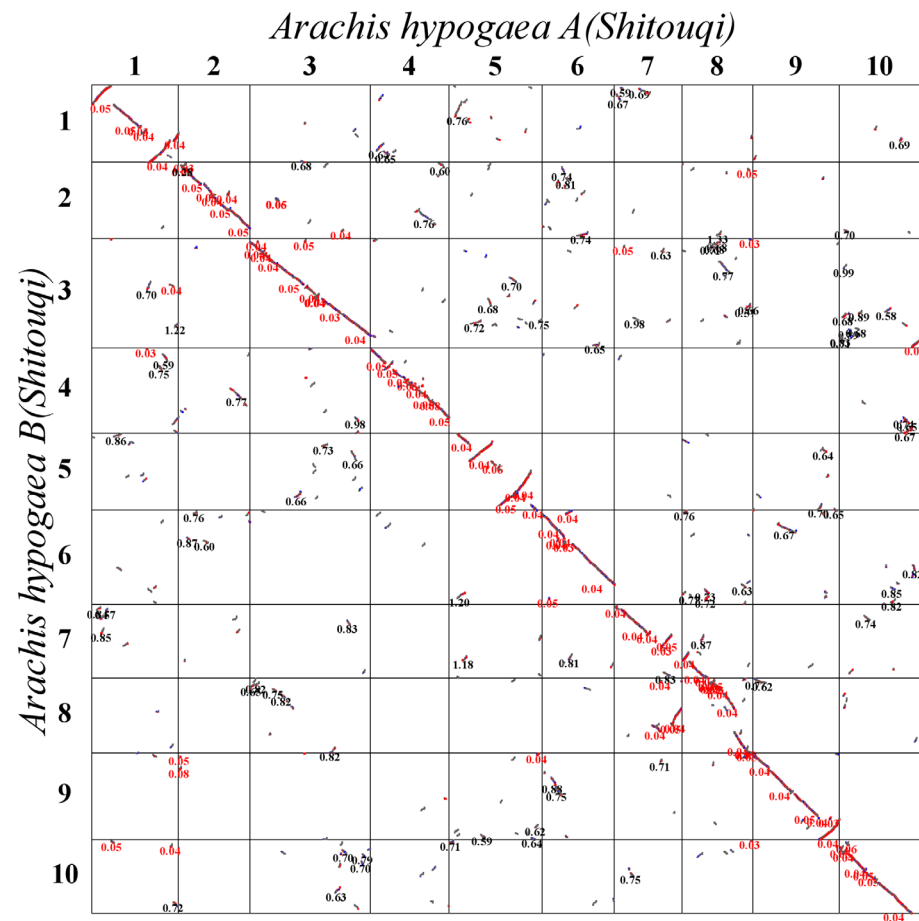

**Supplemental Figure S11.** The homologous colinearity  $K_s$  dotplot between *A. hypogaea* A (Shitouqi) and *A. hypogaea* B (Shitouqi) genomes. The best, secondarily, and other matched homologous gene pairs were shown by red, blue and gray dots, respectively. Mean  $K_s$  of each inferred colinear blocks are shown besides. The  $K_s$  value  $\leq 0.10$  are in red, and others in black, often showing paralogous blocks in duplication events.

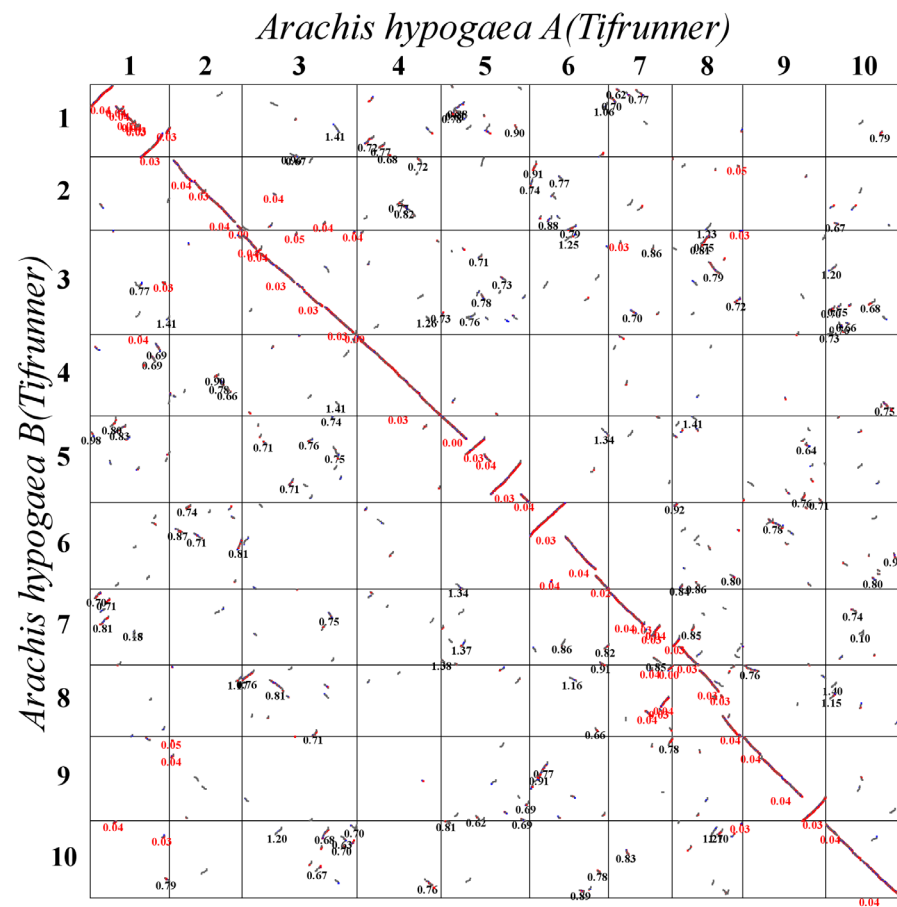

**Supplemental Figure S12.** The homologous colinearity  $K_s$  dotplot between *A. hypogaea* A (Tifrunner) and *A. hypogaea* B (Tifrunner) genomes. The best, secondarily, and other matched homologous gene pairs were shown by red, blue and gray dots, respectively. Mean  $K_s$  of each inferred colinear blocks are shown besides. The  $K_s$  value  $\leq 0.10$  are in red, and others in black, often showing paralogous blocks in duplication events.

**Supplemental tables:****Supplemental Table S1.** Number of homologous blocks and gene pairs within a genome or between genomes.

| Homologous Blocks within and among genome                | BL <sup>a</sup> > 4 | BL >10     | BL >20     | BL >50    | ACGP <sup>b</sup>            | LDB <sup>c</sup> | LDB on chromosomes |
|----------------------------------------------------------|---------------------|------------|------------|-----------|------------------------------|------------------|--------------------|
| <i>A. duranensis</i>                                     | 5,016/599           | 2,355/106  | 1,517/40   | 554/8     | 8.37, 22.22, 37.92, 69.25    | 110              | Ad03-Ad08          |
| <i>A. ipaensis</i>                                       | 5,218/635           | 2,380/106  | 1,531/40   | 499/7     | 8.22, 22.45, 38.27, 71.29    | 85               | Ai04-Ai05          |
| <i>A. monticola</i> A                                    | 2,785/431           | 759/45     | 351/12     | -/-       | 6.46, 16.87, 29.25, -        | 42               | Ama01-Ama05        |
| <i>A. monticola</i> B                                    | 3,561/570           | 742/51     | 187/7      | -/-       | 6.25, 14.55, 26.71, -        | 41               | Amb03-Amb08        |
| <i>A. hypogaea</i> A (Shitouqi)                          | 3,914/548           | 1,332/70   | 697/21     | 169/3     | 7.17, 19.03, 33.19, 56.33    | 61               | Aha03-Aha10        |
| <i>A. hypogaea</i> B (Shitouqi)                          | 4,664/556           | 2,150/89   | 1,414/33   | 585/5     | 8.39, 24.16, 42.85, 117.00   | 195              | Ahb06-Ahb06        |
| <i>A. hypogaea</i> A (Tifrunner)                         | 4,617/580           | 1,981/95   | 1,157/31   | 362/5     | 7.96, 20.85, 37.32, 72.40    | 95               | Aha03-Aha08        |
| <i>A. hypogaea</i> B (Tifrunner)                         | 5,045/665           | 2,031/97   | 1,238/36   | 363/5     | 7.59, 20.94, 34.39, 72.60    | 86               | Ahb03-Ahb08        |
| <i>A. duranensis</i> vs <i>A. ipaensis</i>               | 37,293/2,802        | 24,457/337 | 22,074/151 | 19,458/65 | 13.31, 72.57, 146.19, 299.35 | 1,663            | Ai02-Ad04          |
| <i>A. monticola</i> A vs <i>A. monticola</i> B           | 15,894/2,170        | 5,828/214  | 4,065/81   | 2,565/29  | 7.32, 27.23, 50.19, 88.45    | 211              | Amb10-Ama10        |
| <i>A. hypogaea</i> A vs <i>A. hypogaea</i> B (Shitouqi)  | 31,851/2,991        | 18,070/310 | 15,884/143 | 13,392/61 | 10.65, 58.29, 111.08, 219.54 | 693              | Ahb03-Aha03        |
| <i>A. hypogaea</i> A vs <i>A. hypogaea</i> B (Tifrunner) | 32,815/2,406        | 21,805/316 | 19,580/142 | 16,821/52 | 13.64, 69.00, 137.89, 323.48 | 1,613            | Ahb04-Aha04        |

Note: <sup>a</sup>BL: block\_length; <sup>b</sup>ACGP: average colinear gene pairs respectively per block; <sup>c</sup>LDB: number of colinear gene pairs reside in longest duplicated block.

**Supplemental Table S2.** Number of paralogous and orthologous gene pairs within genome or between studied genomes.

| Species                             | <i>A. duranensis</i> | <i>A. ipaensis</i> | <i>A. monticola A</i> | <i>A. monticola B</i> | <i>A. hypogaea A</i><br>(Shitouqi) | <i>A. hypogaea B</i><br>(Shitouqi) | <i>A. hypogaea A</i><br>(Tifrunner) | <i>A. hypogaea B</i><br>(Tifrunner) |
|-------------------------------------|----------------------|--------------------|-----------------------|-----------------------|------------------------------------|------------------------------------|-------------------------------------|-------------------------------------|
| <i>A. duranensis</i>                | 2,460                | 1,8264             | 10,292                | 9,730                 | 16,784                             | 14,424                             | 17,981                              | 15,987                              |
| <i>A. ipaensis</i>                  | 18,264               | 2,203              | 9,144                 | 11,489                | 14,091                             | 15,897                             | 15,678                              | 20,245                              |
| <i>A. monticola A</i>               | 10,292               | 9,144              | 877                   | 5,297                 | 10,170                             | 7,922                              | 10,785                              | 8,737                               |
| <i>A. monticola B</i>               | 9,730                | 11,489             | 5,297                 | 972                   | 8,504                              | 11,932                             | 9,166                               | 12,089                              |
| <i>A. hypogaea A</i><br>(Shitouqi)  | 16,784               | 14,091             | 10,170                | 8,504                 | 1,837                              | 14,546                             | 17,182                              | 13,566                              |
| <i>A. hypogaea B</i><br>(Shitouqi)  | 14,424               | 15,897             | 7,922                 | 11,932                | 14,546                             | 1,970                              | 13,886                              | 19,264                              |
| <i>A. hypogaea A</i><br>(Tifrunner) | 17,981               | 15,678             | 10,785                | 9,166                 | 17,182                             | 13,886                             | 2,460                               | 16,639                              |
| <i>A. hypogaea B</i><br>(Tifrunner) | 15,987               | 20,245             | 8,737                 | 12,089                | 13,566                             | 19,264                             | 16,639                              | 2,203                               |

Note: The diagonal lines represent the number of paralogous genes within species, while the others represent orthologous genes between species.

**Supplemental Table S3.** Gene conversion between PRT-related duplicated genes in *A. monticola* and *A. hypogaea* genomes.

| Species                             | Quartets patterns | Homologous gene in Quartets | WCV-I <sup>a</sup> | WCV-II <sup>b</sup> | PCV <sup>c</sup> | Total | Conversion rate (%) |
|-------------------------------------|-------------------|-----------------------------|--------------------|---------------------|------------------|-------|---------------------|
| <i>Arachis monticola</i>            | Ad-Ama-Ai-Amb     | 2,625                       | 263                | 354                 | 5                | 433   | 16.5%               |
| <i>Arachis hypogaea</i> (Shitouqi)  | Ad-Aha-Ai-Ahb     | 9,972                       | 607                | 1,006               | 9                | 1,122 | 11.3%               |
| <i>Arachis hypogaea</i> (Tifrunner) | Ad-Aha-Ai-Ahb     | 12,657                      | 1,155              | 1,495               | 29               | 1,706 | 13.5%               |

Note: <sup>a</sup>WCV-I: The similarity of homologous gene pairs measured by *Ks*. <sup>b</sup> WCV-II: The ratios of amino acid locus identity of sequences in each quartet to measure the similarity, and examination of the topological tree changes. <sup>c</sup> PCV: A dynamic programming algorithm combined with phylogenetic analysis.

**Supplemental Table S4.** Nucleotide substitution rates of duplicate genes from quartets in studied peanut genomes.

| Paralogues            |              | Converted genes | Nonconverted genes | P-value<br>(T- test)  |
|-----------------------|--------------|-----------------|--------------------|-----------------------|
| <i>A. duranensis</i>  | <i>Pn</i>    | 0.181           | 0.199              | $6.32 \times 10^{-3}$ |
|                       | <i>Ps</i>    | 0.534           | 0.559              | $6.13 \times 10^{-4}$ |
|                       | <i>Pn/Ps</i> | 0.339           | 0.356              | $2.21 \times 10^{-1}$ |
| <i>A. ipaensis</i>    | <i>Pn</i>    | 0.184           | 0.202              | $4.38 \times 10^{-3}$ |
|                       | <i>Ps</i>    | 0.542           | 0.560              | $1.27 \times 10^{-2}$ |
|                       | <i>Pn/Ps</i> | 0.339           | 0.361              | $1.20 \times 10^{-2}$ |
| <i>A. monticola</i> A | <i>Pn</i>    | 0.200           | 0.210              | $7.69 \times 10^{-1}$ |
|                       | <i>Ps</i>    | 0.557           | 0.555              | $9.35 \times 10^{-1}$ |
|                       | <i>Pn/Ps</i> | 0.359           | 0.378              | $7.81 \times 10^{-1}$ |
| <i>A. monticola</i> B | <i>Pn</i>    | 0.234           | 0.204              | $3.51 \times 10^{-1}$ |
|                       | <i>Ps</i>    | 0.566           | 0.532              | $9.30 \times 10^{-1}$ |
|                       | <i>Pn/Ps</i> | 0.413           | 0.383              | $3.75 \times 10^{-1}$ |

|                                     |              |       |       |                        |
|-------------------------------------|--------------|-------|-------|------------------------|
| <i>A. hypogaea</i> A<br>(Shitouqi)  | <i>Pn</i>    | 0.182 | 0.271 | $1.12 \times 10^{-8}$  |
|                                     | <i>Ps</i>    | 0.528 | 0.586 | $1.97 \times 10^{-7}$  |
|                                     | <i>Pn/Ps</i> | 0.345 | 0.462 | $1.06 \times 10^{-6}$  |
| <i>A. hypogaea</i> B<br>(Shitouqi)  | <i>Pn</i>    | 0.183 | 0.285 | $5.45 \times 10^{-10}$ |
|                                     | <i>Ps</i>    | 0.528 | 0.594 | $1.92 \times 10^{-8}$  |
|                                     | <i>Pn/Ps</i> | 0.347 | 0.480 | $5.45 \times 10^{-8}$  |
| <i>A. hypogaea</i> A<br>(Tifrunner) | <i>Pn</i>    | 0.176 | 0.241 | $7.97 \times 10^{-7}$  |
|                                     | <i>Ps</i>    | 0.526 | 0.574 | $3.71 \times 10^{-6}$  |
|                                     | <i>Pn/Ps</i> | 0.335 | 0.420 | $2.29 \times 10^{-4}$  |
| <i>A. hypogaea</i> B<br>(Tifrunner) | <i>Pn</i>    | 0.201 | 0.250 | $6.10 \times 10^{-5}$  |
|                                     | <i>Ps</i>    | 0.547 | 0.580 | $6.54 \times 10^{-4}$  |
|                                     | <i>Pn/Ps</i> | 0.367 | 0.431 | $4.69 \times 10^{-4}$  |

**Supplemental Table S5.** Nucleotide substitution rates of PRT-related duplicated genes from quartets between peanut genomes.

| Homologous genes                  |              | Converted genes | Nonconverted genes | P-value<br>(T- test)   |
|-----------------------------------|--------------|-----------------|--------------------|------------------------|
| <i>A. monticola</i>               | <i>Pn</i>    | 0.0233          | 0.0453             | $3.71 \times 10^{-8}$  |
|                                   | <i>Ps</i>    | 0.0552          | 0.100              | $3.40 \times 10^{-8}$  |
|                                   | <i>Pn/Ps</i> | 0.422           | 0.453              | $2.57 \times 10^{-7}$  |
| <i>A. hypogaea</i><br>(Shitouqi)  | <i>Pn</i>    | 0.0197          | 0.0385             | $3.14 \times 10^{-17}$ |
|                                   | <i>Ps</i>    | 0.0528          | 0.0788             | $1.05 \times 10^{-12}$ |
|                                   | <i>Pn/Ps</i> | 0.373           | 0.489              | $1.85 \times 10^{-3}$  |
| <i>A. hypogaea</i><br>(Tifrunner) | <i>Pn</i>    | 0.0145          | 0.0256             | $1.62 \times 10^{-14}$ |
|                                   | <i>Ps</i>    | 0.0371          | 0.0627             | $1.33 \times 10^{-21}$ |
|                                   | <i>Pn/Ps</i> | 0.391           | 0.408              | $4.71 \times 10^{-6}$  |
| <i>A. duranensi-A.</i>            | <i>Pn</i>    | 0.0601          | 0.0250             | $5.29 \times 10^{-23}$ |

|                        |              |        |        |                         |
|------------------------|--------------|--------|--------|-------------------------|
| <i>monticola</i> A     | <i>Ps</i>    | 0.126  | 0.0449 | $1.88 \times 10^{-32}$  |
|                        | <i>Pn/Ps</i> | 0.477  | 0.558  | $2.02 \times 10^{-8}$   |
| <i>A. ipaensis-A.</i>  | <i>Pn</i>    | 0.0495 | 0.0243 | $8.08 \times 10^{-13}$  |
| <i>monticola</i> B     | <i>Ps</i>    | 0.0962 | 0.0402 | $2.25 \times 10^{-18}$  |
|                        | <i>Pn/Ps</i> | 0.515  | 0.604  | $1.33 \times 10^{-9}$   |
| <i>A. duranensi-A.</i> | <i>Pn</i>    | 0.0844 | 0.0207 | $3.13 \times 10^{-262}$ |
| <i>hypogaea</i> A      | <i>Ps</i>    | 0.146  | 0.0343 | $4.35 \times 10^{-272}$ |
| (Shitouqi)             | <i>Pn/Ps</i> | 0.578  | 0.603  | $9.83 \times 10^{-9}$   |
| <i>A. ipaensis-A.</i>  | <i>Pn</i>    | 0.0855 | 0.0273 | $4.07 \times 10^{-125}$ |
| <i>hypogaea</i> B      | <i>Ps</i>    | 0.145  | 0.0424 | $1.23 \times 10^{-129}$ |
| (Shitouqi)             | <i>Pn/Ps</i> | 0.590  | 0.644  | $6.82 \times 10^{-23}$  |
| <i>A. duranensi-A.</i> | <i>Pn</i>    | 0.0590 | 0.0155 | $7.04 \times 10^{-217}$ |
| <i>hypogaea</i> A      | <i>Ps</i>    | 0.105  | 0.0280 | $9.40 \times 10^{-218}$ |
| (Tifrunner)            | <i>Pn/Ps</i> | 0.562  | 0.554  | $8.70 \times 10^{-10}$  |
| <i>A. ipaensis-A.</i>  | <i>Pn</i>    | 0.0618 | 0.0187 | $5.05 \times 10^{-148}$ |
| <i>hypogaea</i> B      | <i>Ps</i>    | 0.110  | 0.0318 | $1.29 \times 10^{-133}$ |
| (Tifrunner)            | <i>Pn/Ps</i> | 0.562  | 0.588  | $3.86 \times 10^{-3}$   |

**Supplemental Table S6.** The conversion rate of LCT-related duplicated genes and physical location of genes on chromosomes.

| Species                                  |               | Chr1          | Chr2          | Chr3          | Chr4          | Chr5          | Chr6          | Chr7          | Chr8          | Chr9          | Chr10         | All            | P-value                |
|------------------------------------------|---------------|---------------|---------------|---------------|---------------|---------------|---------------|---------------|---------------|---------------|---------------|----------------|------------------------|
| <i>Arachis duranensis</i>                | All converted | 60<br>(14.1%) | 26<br>(9.7%)  | 67<br>(10.4%) | 37<br>(12.5%) | 48<br>(10.3%) | 50<br>(11.8%) | 31<br>(13.8%) | 48<br>(11.7%) | 35<br>(13.2%) | 38<br>(12.2%) | 440<br>(11.8%) | 0.998                  |
|                                          | Paralogues    | 427           | 269           | 646           | 296           | 468           | 424           | 225           | 410           | 265           | 312           | 3,742          |                        |
| <i>Arachis ipaensi</i>                   | All converted | 59<br>(17.4%) | 37<br>(12.1%) | 29<br>(10.9%) | 72<br>(11.2%) | 46<br>(14.0%) | 57<br>(13.4%) | 57<br>(14.5%) | 40<br>(13.5%) | 45<br>(9.6%)  | 42<br>(15.3%) | 484<br>(13.0%) | 0.934                  |
|                                          | Paralogues    | 340           | 307           | 265           | 645           | 329           | 424           | 393           | 297           | 468           | 274           | 3,742          |                        |
| <i>Arachis monticola</i> A               | All converted | 4<br>(21.1%)  | 2<br>(5.9%)   | 4<br>(16.7%)  | 1<br>(4.3%)   | 4<br>(57.1%)  | 2<br>(5.7%)   | 2<br>(25.0%)  | 4<br>(19.0%)  | 1<br>(9.1%)   | 2<br>(12.5%)  | 26<br>(13.1%)  | 2.20×10 <sup>-16</sup> |
|                                          | Paralogues    | 19            | 34            | 24            | 23            | 7             | 35            | 8             | 21            | 11            | 16            | 198            |                        |
| <i>Arachis monticola</i> B               | All converted | 3<br>(17.6%)  | 5<br>(15.2%)  | 4<br>(16.0%)  | 4<br>(17.4%)  | 0<br>(0.0%)   | 4<br>(11.1%)  | 0<br>(0.0%)   | 3<br>(12.5%)  | 2<br>(18.2%)  | 3<br>(18.8%)  | 28<br>(14.1%)  | 4.04×10 <sup>-5</sup>  |
|                                          | Paralogues    | 17            | 33            | 25            | 23            | 6             | 36            | 7             | 24            | 11            | 16            | 198            |                        |
| <i>Arachis hypogaea</i> A<br>(Shitouqi)  | All converted | 31<br>(11.2%) | 22<br>(12.4%) | 49<br>(8.8%)  | 28<br>(14.4%) | 27<br>(8.4%)  | 24<br>(9.1%)  | 13<br>(10.2%) | 38<br>(12.8%) | 9<br>(4.6%)   | 11<br>(5.0%)  | 252<br>(9.6%)  | 0.389                  |
|                                          | Paralogues    | 278           | 177           | 556           | 194           | 321           | 265           | 127           | 296           | 195           | 219           | 2,628          |                        |
| <i>Arachis hypogaea</i> B<br>(Shitouqi)  | All converted | 36<br>(13.6%) | 19<br>(9.9%)  | 46<br>(7.7%)  | 21<br>(10.3%) | 23<br>(7.2%)  | 18<br>(6.8%)  | 28<br>(14.9%) | 17<br>(7.8%)  | 6<br>(3.1%)   | 16<br>(8.9%)  | 230<br>(8.8%)  | 0.238                  |
|                                          | Paralogues    | 265           | 192           | 599           | 204           | 321           | 265           | 188           | 219           | 195           | 180           | 2,628          |                        |
| <i>Arachis hypogaea</i> A<br>(Tifrunner) | All converted | 36<br>(8.4%)  | 25<br>(10.0%) | 31<br>(4.2%)  | 22<br>(8.0%)  | 38<br>(7.6%)  | 40<br>(9.3%)  | 11<br>(4.4%)  | 21<br>(4.5%)  | 23<br>(8.4%)  | 17<br>(5.6%)  | 264<br>(6.8%)  | 0.738                  |
|                                          | Paralogues    | 431           | 251           | 733           | 274           | 499           | 430           | 248           | 466           | 273           | 301           | 3,906          |                        |
| <i>Arachis hypogaea</i> B<br>(Tifrunner) | All converted | 30<br>(7.9%)  | 20<br>(8.0%)  | 46<br>(6.3%)  | 21<br>(7.4%)  | 44<br>(8.8%)  | 31<br>(7.2%)  | 22<br>(7.0%)  | 24<br>(6.1%)  | 25<br>(9.0%)  | 15<br>(4.4%)  | 278<br>(7.1%)  | 0.985                  |
|                                          | Paralogues    | 381           | 250           | 735           | 282           | 499           | 430           | 313           | 396           | 277           | 343           | 3,906          |                        |

**Supplemental Table S7.** The conversion rate of PRT-related duplicated genes and physical location of genes on chromosomes.

| Species                                  |                 | Chr1          | Chr2           | Chr3           | Chr4           | Chr5           | Chr6           | Chr7           | Chr8           | Chr9           | Chr10         | All              | P-value               |
|------------------------------------------|-----------------|---------------|----------------|----------------|----------------|----------------|----------------|----------------|----------------|----------------|---------------|------------------|-----------------------|
| <i>Arachis monticola</i> A               | All converted   | 56<br>(14.9%) | 30<br>(14.9%)  | 45<br>(16.2%)  | 52<br>(21.1%)  | 24<br>(18.5%)  | 47<br>(16.5%)  | 37<br>(19.0%)  | 46<br>(13.6%)  | 51<br>(19.7%)  | 45<br>(15.0%) | 433<br>(16.5%)   | 0.952                 |
|                                          | Homologous gene | 377           | 201            | 277            | 246            | 130            | 285            | 195            | 337            | 259            | 300           | 2,625            |                       |
| <i>Arachis monticola</i> B               | All converted   | 52<br>(16.6%) | 31<br>(16.1%)  | 44<br>(14.2%)  | 52<br>(17.1%)  | 24<br>(22.9%)  | 47<br>(16.3%)  | 51<br>(20.6%)  | 32<br>(11.6%)  | 51<br>(18.4%)  | 48<br>(15.4%) | 433<br>(16.5%)   | 0.802                 |
|                                          | Homologous gene | 313           | 192            | 309            | 304            | 105            | 289            | 248            | 275            | 277            | 312           | 2,625            |                       |
| <i>Arachis hypogaea</i> A<br>(Shitouqi)  | All converted   | 98<br>(8.4%)  | 71<br>(10.7%)  | 258<br>(16.0%) | 72<br>(9.5%)   | 111<br>(10.3%) | 107<br>(11.0%) | 71<br>(10.8%)  | 123<br>(12.9%) | 128<br>(11.7%) | 83<br>(8.2%)  | 1,122<br>(11.3%) | 0.894                 |
|                                          | Homologous gene | 1,172         | 665            | 1,613          | 756            | 1,073          | 972            | 656            | 952            | 1,095          | 1,018         | 9,972            |                       |
| <i>Arachis hypogaea</i> B<br>(Shitouqi)  | All converted   | 90<br>(8.5%)  | 77<br>(11.5%)  | 271<br>(15.0%) | 74<br>(9.5%)   | 108<br>(10.4%) | 107<br>(11.0%) | 101<br>(11.6%) | 85<br>(11.8%)  | 133<br>(11.6%) | 76<br>(8.3%)  | 1,122<br>(11.3%) | 0.961                 |
|                                          | Homologous gene | 1,059         | 671            | 1,804          | 775            | 1,040          | 972            | 868            | 722            | 1,149          | 912           | 9,972            |                       |
| <i>Arachis hypogaea</i> A<br>(Tifrunner) | All converted   | 97<br>(7.3%)  | 199<br>(22.8%) | 175<br>(8.8%)  | 206<br>(8.4%)  | 383<br>(17.1%) | 201<br>(15.0%) | 144<br>(16.1%) | 106<br>(8.4%)  | 119<br>(9.3%)  | 76<br>(6.9%)  | 1,706<br>(13.5%) | 1.01×10 <sup>-2</sup> |
|                                          | Homologous gene | 1,330         | 873            | 1,991          | 1,203          | 1,463          | 1,343          | 892            | 1,262          | 1,275          | 1,104         | 12,656           |                       |
| <i>Arachis hypogaea</i> B<br>(Tifrunner) | All converted   | 88<br>(7.3%)  | 199<br>(23.3%) | 175<br>(9.1%)  | 210<br>(17.1%) | 383<br>(26.2%) | 201<br>(15.0%) | 94<br>(8.2%)   | 154<br>(15.7%) | 121<br>(9.3%)  | 81<br>(6.7%)  | 1,706<br>(13.5%) | 3.06×10 <sup>-4</sup> |
|                                          | Homologous gene | 1,200         | 854            | 1,926          | 1,225          | 1,463          | 1,343          | 1,147          | 978            | 1,303          | 1,217         | 12,656           |                       |

**Supplemental Table S8.** The converted duplicates of LCT-related in each interval from the terminal.

| The rate to the end of the chromosome | 0-0.05 <sup>a</sup> | 0.05-0.1       | 0.1-0.15      | 0.15-0.2      | 0.2-0.25     | 0.25-0.3     | >0.3          | P-value                | All |
|---------------------------------------|---------------------|----------------|---------------|---------------|--------------|--------------|---------------|------------------------|-----|
| <i>Arachis duranensis</i>             | 146<br>(33.2%)      | 90<br>(20.4%)  | 56<br>(12.7%) | 43<br>(9.8%)  | 28<br>(6.4%) | 17<br>(3.9%) | 60<br>(13.6%) | 2.20×10 <sup>-16</sup> | 440 |
| <i>Arachis ipaensi</i>                | 183<br>(37.8%)      | 105<br>(21.7%) | 72<br>(14.9%) | 51<br>(10.5%) | 29<br>(6.0%) | 17<br>(3.5%) | 27<br>(5.6%)  | 2.20×10 <sup>-16</sup> | 484 |
| <i>Arachis monticola</i> A            | 9<br>(34.6%)        | 1<br>(3.8%)    | 3<br>(11.5%)  | 1<br>(3.8%)   | 2<br>(7.7%)  | 3<br>(11.5%) | 7<br>(26.9%)  | 1.70×10 <sup>-2</sup>  | 26  |
| <i>Arachis monticola</i> B            | 7<br>(25.0%)        | 7<br>(25.0%)   | 1<br>(3.6%)   | 6<br>(21.4%)  | 5<br>(17.9%) | 2<br>(7.1%)  | 0<br>(0.0%)   | 4.30×10 <sup>-2</sup>  | 28  |
| <i>Arachis hypogaea</i> A (Shitouqi)  | 46<br>(18.3%)       | 52<br>(20.1%)  | 43<br>(17.1%) | 42<br>(16.7%) | 20<br>(7.9%) | 16<br>(6.3%) | 33<br>(13.1%) | 2.86×10 <sup>-5</sup>  | 252 |
| <i>Arachis hypogaea</i> B (Shitouqi)  | 66<br>(28.7%)       | 59<br>(25.7%)  | 35<br>(15.2%) | 23<br>(10.0%) | 19<br>(8.3%) | 13<br>(5.7%) | 15<br>(6.5%)  | 1.42×10 <sup>-15</sup> | 230 |
| <i>Arachis hypogaea</i> A (Tifrunner) | 72<br>(27.3%)       | 56<br>(21.2%)  | 46<br>(17.4%) | 28<br>(10.6%) | 16<br>(6.1%) | 11<br>(4.2%) | 35<br>(13.3%) | 2.41×10 <sup>-14</sup> | 264 |
| <i>Arachis hypogaea</i> B (Tifrunner) | 116<br>(41.7%)      | 47<br>(16.9%)  | 29<br>(10.4%) | 29<br>(10.4%) | 21<br>(7.6%) | 17<br>(6.1%) | 19<br>(6.8%)  | 2.20×10 <sup>-16</sup> | 278 |

Note: <sup>a</sup>Within 5% of the end of the chromosome.

**Supplemental Table S9.** The converted duplicates of PRT-related in each interval from the terminal.

| The rate to the end of the chromosome | 0-0.05           | 0.05-0.1       | 0.1-0.15       | 0.15-0.2      | 0.2-0.25      | 0.25-0.3     | >0.3           | P-value                | All   |
|---------------------------------------|------------------|----------------|----------------|---------------|---------------|--------------|----------------|------------------------|-------|
| <i>Arachis monticola</i> A            | 114<br>(26.3%)   | 117<br>(27.0%) | 48<br>(11.1%)  | 32<br>(7.4%)  | 31<br>(7.2%)  | 26<br>(6.0%) | 65<br>(15.0%)  | $2.20 \times 10^{-16}$ | 433   |
| <i>Arachis monticola</i> B            | 85<br>(19.6%)    | 59<br>(13.6%)  | 61<br>(14.1%)  | 85<br>(19.6%) | 64<br>(14.5%) | 25<br>(5.8%) | 55<br>(12.7%)  | $4.23 \times 10^{-7}$  | 433   |
| <i>Arachis hypogaea</i> A (Shitouqi)  | 365<br>(32.5%)   | 271<br>(24.1%) | 142<br>(12.7%) | 102<br>(9.1%) | 77<br>(6.9%)  | 46<br>(4.1%) | 119<br>(10.6%) | $2.20 \times 10^{-16}$ | 1,122 |
| <i>Arachis hypogaea</i> B (Shitouqi)  | 327<br>(29.1%)   | 330<br>(29.4%) | 168<br>(15.0%) | 110<br>(9.8%) | 80<br>(7.1%)  | 45<br>(4.0%) | 62<br>(5.5%)   | $2.20 \times 10^{-16}$ | 1,122 |
| <i>Arachis hypogaea</i> A (Tifrunner) | 975<br>(57.2%)   | 272<br>(15.9%) | 132<br>(7.7%)  | 93<br>(5.5%)  | 74<br>(4.3%)  | 48<br>(2.8%) | 112<br>(6.6%)  | $2.20 \times 10^{-16}$ | 1,706 |
| <i>Arachis hypogaea</i> B (Tifrunner) | 1,064<br>(62.4%) | 246<br>(14.4%) | 139<br>(8.1%)  | 93<br>(5.5%)  | 71<br>(4.2%)  | 47<br>(2.8%) | 46<br>(2.7%)   | $2.20 \times 10^{-16}$ | 1,706 |

**Supplemental Table S10.** Relationship between the gene physical location and gene conversion of LCT-related.

| Species                               | Distance to telomere | <5 Mb  | 5-10Mb | 10-15Mb | 15-20Mb | >20Mb  | All    |
|---------------------------------------|----------------------|--------|--------|---------|---------|--------|--------|
| <i>Arachis duranensis</i>             | All converted        | 135    | 80     | 66      | 58      | 91     | 440    |
|                                       | Paralogues           | 1,052  | 759    | 594     | 506     | 831    | 3,742  |
|                                       | Mean converted rate  | 13.10% | 10.47% | 11.04%  | 13.43%  | 8.07%  | 11.80% |
| <i>Arachis ipaensi</i>                | All converted        | 145    | 102    | 67      | 52      | 118    | 484    |
|                                       | Paralogues           | 1,211  | 712    | 485     | 388     | 946    | 3,742  |
|                                       | Mean converted rate  | 11.95% | 14.32% | 13.68%  | 14.10%  | 10.38% | 13.00% |
| <i>Arachis monticola</i> A            | All converted        | 2      | 4      | 1       | 3       | 16     | 26     |
|                                       | Paralogues           | 21     | 16     | 31      | 14      | 106    | 198    |
|                                       | Mean converted rate  | 14.48% | 8.57%  | 13.43%  | 10.83%  | 8.05%  | 13.10% |
| <i>Arachis monticola</i> B            | All converted        | 0      | 3      | 4       | 1       | 19     | 28     |
|                                       | Paralogues           | 10     | 6      | 16      | 10      | 151    | 198    |
|                                       | Mean converted rate  | 31.67% | 27.33% | 18.57%  | 4.00%   | 6.49%  | 14.10% |
| <i>Arachis hypogaea</i> A (Shitouqi)  | All converted        | 42     | 50     | 43      | 45      | 72     | 252    |
|                                       | Paralogues           | 546    | 588    | 449     | 348     | 697    | 2,628  |
|                                       | Mean converted rate  | 7.76%  | 8.54%  | 9.47%   | 12.12%  | 8.94%  | 9.60%  |
| <i>Arachis hypogaea</i> B (Shitouqi)  | All converted        | 47     | 49     | 31      | 25      | 78     | 230    |
|                                       | Paralogues           | 607    | 441    | 367     | 360     | 853    | 2,628  |
|                                       | Mean converted rate  | 7.69%  | 10.56% | 8.35%   | 7.72%   | 7.75%  | 8.80%  |
| <i>Arachis hypogaea</i> A (Tifrunner) | All converted        | 59     | 51     | 52      | 35      | 67     | 264    |
|                                       | Paralogues           | 1,161  | 761    | 595     | 458     | 931    | 3,906  |
|                                       | Mean converted rate  | 5.18%  | 6.69%  | 8.52%   | 7.71%   | 9.17%  | 6.80%  |
| <i>Arachis hypogaea</i> B (Tifrunner) | All converted        | 87     | 43     | 33      | 21      | 94     | 278    |
|                                       | Paralogues           | 1,235  | 702    | 514     | 415     | 1,040  | 3,906  |
|                                       | Mean converted rate  | 7.12%  | 6.00%  | 6.39%   | 4.85%   | 7.69%  | 7.10%  |

**Supplemental Table S11.** Relationship between the gene physical location and gene conversion of PRT-related.

| Species                               | Distance to telomere | <5 Mbp | 5-10Mbp | 10-15Mbp | 15-20Mbp | >20Mbp | All    |
|---------------------------------------|----------------------|--------|---------|----------|----------|--------|--------|
| <i>Arachis monticola</i> A            | All converted        | 122    | 113     | 62       | 35       | 101    | 433    |
|                                       | Homologous gene      | 682    | 685     | 350      | 291      | 617    | 2,625  |
|                                       | Mean converted rate  | 18.04% | 16.25%  | 16.85%   | 12.57%   | 12.21% | 16.50% |
| <i>Arachis monticola</i> B            | All converted        | 51     | 75      | 25       | 39       | 243    | 433    |
|                                       | Homologous gene      | 269    | 381     | 254      | 285      | 1,436  | 2,625  |
|                                       | Mean converted rate  | 18.43% | 19.78%  | 9.30%    | 14.25%   | 15.75% | 16.50% |
| <i>Arachis hypogaea</i> A (Shitouqi)  | All converted        | 316    | 294     | 168      | 106      | 238    | 1122   |
|                                       | Homologous gene      | 2,390  | 2,372   | 1,699    | 1,101    | 2,410  | 9,972  |
|                                       | Mean converted rate  | 13.26% | 12.30%  | 9.74%    | 9.75%    | 8.53%  | 11.30% |
| <i>Arachis hypogaea</i> B (Shitouqi)  | All converted        | 225    | 239     | 216      | 106      | 336    | 1,122  |
|                                       | Homologous gene      | 2,185  | 1,748   | 1,550    | 1,097    | 3,392  | 9,972  |
|                                       | Mean converted rate  | 10.32% | 13.64%  | 14.05%   | 9.66%    | 8.50%  | 11.30% |
| <i>Arachis hypogaea</i> A (Tifrunner) | All converted        | 883    | 315     | 170      | 107      | 231    | 1,706  |
|                                       | Homologous gene      | 3,794  | 2,807   | 2,031    | 1,234    | 2,790  | 12,656 |
|                                       | Mean converted rate  | 22.48% | 10.87%  | 8.61%    | 8.79%    | 6.17%  | 13.50% |
| <i>Arachis hypogaea</i> B (Tifrunner) | All converted        | 892    | 280     | 144      | 103      | 287    | 1,706  |
|                                       | Homologous gene      | 3,741  | 2,491   | 1,673    | 1,236    | 3,515  | 12,656 |
|                                       | Mean converted rate  | 22.96% | 11.18%  | 8.56%    | 8.33%    | 6.73%  | 13.50% |

**Supplemental Table S12.** Relationship between the block number and gene conversion of LCT-related.

| Species                               |           | Chr1 | Chr2 | Chr3 | Chr4 | Chr5 | Chr6 | Chr7 | Chr8 | Chr9 | Chr10 |
|---------------------------------------|-----------|------|------|------|------|------|------|------|------|------|-------|
| <i>Arachis duranensis</i>             | CV rate   | 0.14 | 0.10 | 0.10 | 0.13 | 0.10 | 0.12 | 0.14 | 0.12 | 0.13 | 0.12  |
|                                       | Block num | 94   | 41   | 125  | 51   | 66   | 56   | 42   | 82   | 41   | 66    |
| <i>Arachis ipaensi</i>                | CV rate   | 0.17 | 0.12 | 0.11 | 0.11 | 0.14 | 0.13 | 0.15 | 0.14 | 0.10 | 0.15  |
|                                       | Block num | 127  | 59   | 63   | 146  | 57   | 61   | 66   | 83   | 57   | 34    |
| <i>Arachis monticola</i> A            | CV rate   | 0.21 | 0.06 | 0.17 | 0.04 | 0.57 | 0.06 | 0.25 | 0.19 | 0.09 | 0.13  |
|                                       | Block num | 80   | 23   | 40   | 57   | 50   | 32   | 32   | 28   | 23   | 46    |
| <i>Arachis monticola</i> B            | CV rate   | 0.18 | 0.15 | 0.16 | 0.17 | 0.00 | 0.11 | 0.00 | 0.13 | 0.18 | 0.19  |
|                                       | Block num | 39   | 29   | 85   | 28   | 18   | 50   | 75   | 58   | 23   | 58    |
| <i>Arachis hypogaea</i> A (Shitouqi)  | CV rate   | 0.11 | 0.12 | 0.09 | 0.14 | 0.08 | 0.09 | 0.10 | 0.13 | 0.05 | 0.05  |
|                                       | Block num | 87   | 40   | 107  | 35   | 62   | 60   | 47   | 82   | 47   | 63    |
| <i>Arachis hypogaea</i> B (Shitouqi)  | CV rate   | 0.14 | 0.10 | 0.08 | 0.10 | 0.07 | 0.07 | 0.15 | 0.08 | 0.03 | 0.09  |
|                                       | Block num | 42   | 41   | 109  | 83   | 51   | 104  | 84   | 26   | 50   | 39    |
| <i>Arachis hypogaea</i> A (Tifrunner) | CV rate   | 0.08 | 0.10 | 0.04 | 0.08 | 0.08 | 0.09 | 0.04 | 0.05 | 0.08 | 0.06  |
|                                       | Block num | 78   | 38   | 127  | 47   | 62   | 53   | 46   | 75   | 55   | 51    |
| <i>Arachis hypogaea</i> B (Tifrunner) | CV rate   | 0.08 | 0.08 | 0.06 | 0.07 | 0.09 | 0.07 | 0.07 | 0.06 | 0.09 | 0.04  |
|                                       | Block num | 70   | 37   | 113  | 52   | 72   | 83   | 106  | 53   | 42   | 89    |

**Supplemental Table S13.** Relationship between the block number and gene conversion of PRT-related.

| Species                               |           | Chr1 | Chr2 | Chr3 | Chr4 | Chr5 | Chr6 | Chr7 | Chr8 | Chr9 | Chr10 |
|---------------------------------------|-----------|------|------|------|------|------|------|------|------|------|-------|
| <i>Arachis monticola</i> A            | CV rate   | 0.15 | 0.15 | 0.16 | 0.21 | 0.19 | 0.17 | 0.19 | 0.14 | 0.20 | 0.15  |
|                                       | Block num | 80   | 23   | 40   | 57   | 50   | 32   | 32   | 28   | 23   | 46    |
| <i>Arachis monticola</i> B            | CV rate   | 0.17 | 0.16 | 0.14 | 0.17 | 0.23 | 0.16 | 0.21 | 0.12 | 0.18 | 0.15  |
|                                       | Block num | 39   | 29   | 85   | 28   | 18   | 50   | 75   | 58   | 23   | 58    |
| <i>Arachis hypogaea</i> A (Shitouqi)  | CV rate   | 0.08 | 0.11 | 0.16 | 0.10 | 0.10 | 0.11 | 0.11 | 0.13 | 0.12 | 0.08  |
|                                       | Block num | 87   | 40   | 107  | 35   | 62   | 60   | 47   | 82   | 47   | 63    |
| <i>Arachis hypogaea</i> B (Shitouqi)  | CV rate   | 0.09 | 0.12 | 0.15 | 0.10 | 0.10 | 0.11 | 0.12 | 0.12 | 0.12 | 0.08  |
|                                       | Block num | 42   | 41   | 109  | 83   | 51   | 104  | 84   | 26   | 50   | 39    |
| <i>Arachis hypogaea</i> A (Tifrunner) | CV rate   | 0.07 | 0.23 | 0.09 | 0.08 | 0.17 | 0.15 | 0.16 | 0.08 | 0.09 | 0.07  |
|                                       | Block num | 78   | 38   | 127  | 47   | 62   | 53   | 46   | 75   | 55   | 51    |
| <i>Arachis hypogaea</i> B (Tifrunner) | CV rate   | 0.07 | 0.23 | 0.09 | 0.17 | 0.26 | 0.15 | 0.08 | 0.16 | 0.09 | 0.07  |
|                                       | Block num | 70   | 37   | 113  | 52   | 72   | 83   | 106  | 53   | 42   | 89    |

**Supplemental Table S14.** Relationship between the block length (colinear gene pairs) and gene conversion of LCT-related.

| Block length                          |         | 0-10  | 10-20 | 20-30 | 30-40 | 40-50 | >50   |
|---------------------------------------|---------|-------|-------|-------|-------|-------|-------|
| <i>Arachis duranensis</i>             | CV rate | 0.04  | 0.06  | 0.098 | 0.098 | 0.097 | 0.135 |
| <i>Arachis ipaensi</i>                | CV rate | 0.038 | 0.071 | 0.059 | 0.081 | 0.108 | 0.104 |
| <i>Arachis monticola</i> A            | CV rate | 0.006 | 0.014 | 0     | -     | 0     | -     |
| <i>Arachis monticola</i> B            | CV rate | 0.005 | 0.008 | 0     | -     | 0     | -     |
| <i>Arachis hypogaea</i> A (Shitouqi)  | CV rate | 0.033 | 0.035 | 0.093 | 0.098 | 0.102 | 0.099 |
| <i>Arachis hypogaea</i> B (Shitouqi)  | CV rate | 0.026 | 0.046 | 0.034 | 0.093 | 0     | 0.057 |
| <i>Arachis hypogaea</i> A (Tifrunner) | CV rate | 0.033 | 0.037 | 0.045 | 0.084 | 0.056 | 0.053 |
| <i>Arachis hypogaea</i> B (Tifrunner) | CV rate | 0.025 | 0.050 | 0.057 | 0.060 | 0.093 | 0.067 |

**Supplemental Table S15.** Relationship between the block length (colinear gene pairs) and gene conversion of PRT-related.

| Block length                        |         | 0-50  | 50-100 | 100-150 | 150-200 | >200  |
|-------------------------------------|---------|-------|--------|---------|---------|-------|
| <i>Arachis monticola</i>            | CV rate | 0.053 | 0.097  | 0.108   | -       | 0.123 |
| <i>Arachis hypogaea</i> (Shitouqi)  | CV rate | 0.036 | 0.070  | 0.088   | 0.070   | 0.081 |
| <i>Arachis hypogaea</i> (Tifrunner) | CV rate | 0.044 | 0.075  | 0.230   | 0.270   | 0.092 |

**Supplemental Table S16.** Statistics of the converted and duplicated genes from top four functions from the Shitouqi and Tifrunner genomes.

| GO level2          | <i>A. hypogaea</i> A (Shitouqi) |         | <i>A. hypogaea</i> B (Shitouqi) |         | <i>A. hypogaea</i> A (Tifrunner) |         | <i>A. Hypogaea</i> B (Tifrunner) |         |
|--------------------|---------------------------------|---------|---------------------------------|---------|----------------------------------|---------|----------------------------------|---------|
|                    | cv vs. all                      | P-value | cv vs. all                      | P-value | cv vs. all                       | P-value | cv vs. all                       | P-value |
| Catalytic activity | 31.4 vs. 25.5                   | 0.802   | 20.4 vs. 15.1                   | 0.029   | 23.3 vs. 15.1                    | <0.001  | 19.4 vs. 15.4                    | 0.088   |
| Binding            | 31.7 vs. 28.2                   | 0.323   | 17.4 vs. 18.7                   | 0.609   | 21.0 vs. 19.5                    | 0.543   | 19.6 vs. 19.1                    | 0.820   |
| Metabolic process  | 25.7 vs. 23.7                   | 0.482   | 18.3 vs. 15.6                   | 0.281   | 24.8 vs. 15.2                    | <0.001  | 18.2 vs. 15.1                    | 0.174   |
| Cellular process   | 17.5 vs. 19.6                   | 0.550   | 15.7 vs. 12.4                   | 0.151   | 14.5 vs. 12.3                    | 0.294   | 10.5 vs. 12.1                    | 0.454   |

Note: Percentage of converted genes (cv), percentage of duplicated genes (all).
